# Supplementary material for: The Transmembrane Morphogenesis Protein gp1 of Filamentous Phages Contains Walker A and Walker B Motifs Essential for Phage Assembly
Source: Viruses. 2017 Apr 9;9(4):73. doi: 10.3390/v9040073 (PMC5408679; doi:10.3390/v9040073)

Suppl. Fig. 1: Protein sequence homology alignment of gp1 proteins from filamentous phages. M13 for Bacteriophage M13 gp1, uniprot number P03656. I2 for Bacteriophage I2-2 gp1, uniprot number P15418. IF1 for Bacteriophage If1 gp1, uniprot number O80299. fd for Bacteriophage fd gp1, uniprot number P03655. IKe for Bacteriophage IKe gp1, uniprot number P03658. f1 for Bacteriophage f1 gp1, uniprot number P03657. V\_VJF for *Vibrio cholerae* phage VJF-Phi ORF422. XantoPhiLf for *Xanthomonas* phage phiLf, uniprot number O55247. PropionibacB5 for Bacteriophage phiB5 of *Propionibacterium freudenreichii*.

Suppl. Fig. 2: Protein sequence homology alignment of the N-terminal region of gp1 proteins from filamentous phages. The putative Walker A and Walker B motifs are illustrated by red boxes. The consensus Walker motifs are depicted above the respective motifs. X represents any amino acid while h represents hydrophobic residues. M13 for Bacteriophage M13 gp1, uniprot number P03656. I2 for Bacteriophage I2-2 gp1, uniprot number P15418. IF1 for Bacteriophage If1 gp1, uniprot number O80299. fd for Bacteriophage fd gp1, uniprot number P03655. IKe for Bacteriophage IKe gp1, uniprot number P03658. f1 for Bacteriophage f1 gp1, uniprot number P03657. V\_VJF for *Vibrio cholerae* phage VJF-Phi ORF422. XantoPhiLf for *Xanthomonas* phage phiLf, uniprot number O55247. PropionibacB5 for Bacteriophage phiB5 of *Propionibacterium freudenreichii*.

Suppl. Fig. 3: Protein sequence homology alignment of gp1 proteins from filamentous phages. All cysteine residues of M13 are shown in yellow boxes and numbered above. The six tested glycine residues with putative hinge-like functions are boxed in green and numbered above. I2 for Bacteriophage I2-2 gp1, uniprot number P15418. IF1 for Bacteriophage If1 gp1, uniprot number O80299. fd for Bacteriophage fd gp1, uniprot

number P03655. IKe for Bacteriophage IKe gp1, uniprot number P03658. M13 for Bacteriophage M13 gp1, uniprot number P03656. f1 for Bacteriophage f1 gp1, uniprot number P03657.

Suppl. Fig. 4: Western blot analysis of His-tagged gp1 mutants and wild type (wt) expressed in the *E. coli* M15 strain used in complementation assays. Top panel depicts protein detected by  $\alpha$ -His antibody. Lower panel depicts protein detected by  $\alpha$ -OmpA antibody. The Outer membrane protein A, OmpA was used as an expression control. (A) Gp1 Walker A mutants K14A and K14R. (B) Gp1 Walker B mutants D88N and E89Q. (C) Gp1 glycine mutations G29P and G118P.

## Supplementary Figure 1

|               |   |                                                             |
|---------------|---|-------------------------------------------------------------|
| M13           | 1 | MA-VY-----FVTGKLGSGKTLVSVG-KIQDKIVAGCKIATNLD-LRLQNLPO       |
| I2            | 1 | MA-VY-----VVTGKLGAGKTLVAVS-RIQRTLAKGGIVATNLN-LKLHHFPQ       |
| IF1           | 1 | MA-VY-----VVTGKLGAGKTLVAVG-KIQDKIVSGCRVATNLD-LRIHKLPR       |
| fd            | 1 | MA-VY-----FVTGKLGSGKTLVSVG-KIQDKIVAGCKIATNLD-LRLQNLPO       |
| IKe           | 1 | MA-VY-----VVTGKLGAGKTLVAVS-RIQRTLAKGGIVATNLN-LKLHHFPQ       |
| f1            | 1 | MA-VY-----FVTGKLGSGKTLVSVG-KIQDKIVAGCKIATNLD-LRLQNLPO       |
| V_VJF         | 1 | MASVY-----FVTGKLGSGKSLIAVS-RIRDALMRGVPVATNLN-INLKEM--       |
| XantoPhiLf    | 1 | ML-VF-----NEGVPRAKGSYDAVKNHILPALKKGRVVFARLNGLRFDRIAK        |
| PropionibacB5 | 1 | MS-WQSKRDLRRRFGIVGYVGSNGSGKSLMAVL-DTMTPLEAGRQVLSTVR-LLDWENR |

|               |    |                                                               |
|---------------|----|---------------------------------------------------------------|
| M13           | 46 | V-GRFAK-TPRVLRIIPDKPSISDLLAIGRGND---SYDENKNGLLVLDECGTWFNTRSW  |
| I2            | 46 | V-GRYAK-QCRMRIADKPTLEDLEAIGRGNL---SYDESKNGLIVLDECGTWFNSRNW    |
| IF1           | 46 | V-GIFAK-SPDVIRIPDKPSLDDLLAIGRGNN---SYDENKNGLLVLDECGTWFNSRSW   |
| fd            | 46 | V-GRFAK-TPRVLRIIPDKPSISDLLAIGRGND---SYDENKNGLLVLDECGTWFNTRSW  |
| IKe           | 46 | V-GRYAK-QCRMRIADKPTLEDLEAIGRGNL---TYDESKNGLLVLDECGTWFNSRNW    |
| f1            | 46 | V-GRFAK-TPRVLRIIPDKPSISDLLAIGRGND---SYDENKNGLLVLDECGTWFNTRSW  |
| V_VJF         | 45 | I-GRDKR-NTRIYRIIPDKPTVEDIEILGYVNK---SYDTSKDGLIVLDECGTWFNSRTW  |
| XantoPhiLf    | 47 | HLGMAENDVQHLLVLVDTKDVSKLFACTQDESGKWCIPDEFKDALVVIDEVHEFYVNER-  |
| PropionibacB5 | 58 | P-CDDP--GCDLPGHPDHLAAHPLWVPLRELS---QMLDFEGGDIIILDEVTVGVASSRES |

|               |     |                                                               |
|---------------|-----|---------------------------------------------------------------|
| M13           | 100 | NDKERQPII-DWFLHARKLGWDIIFLVQDLSIVDKQARSALAEHVVCRRLDKITIP---   |
| I2            | 100 | SDKSRQPMI-DWFLHARKLGWDVIFIIQDISLMDKQAREALAEHVVCRRLDKINIP---   |
| IF1           | 100 | ADKERQSVI-NWFLHARKLGWDIIFLIQDLSIMDKQARVALAEHVVCRRLDKITIP---   |
| fd            | 100 | NDKERQPII-DWFLHARKLGWDIIFLVQDLSIVDKQARSALAEHVVCRRLDKITIP---   |
| IKe           | 100 | SDKSRQPMI-DWFLHARKLGWDIIFIIQDISLMDKQARDALAEHVVCRRLDKINIP---   |
| f1            | 100 | NDKERQPII-DWFLHARKLGWDIIFLVQDLSIVDKQARSALAEHVVCRRLDKITIP---   |
| V_VJF         | 99  | NDKNRQALL-DRFLHIRKLGWDVIFIVQNISMVDKQAREGLAEHVHCKRLDRMQIP---   |
| XantoPhiLf    | 106 | --KPLAPAVENFWALLGQNGGDAVIMTQWINRLHSAVKAR-IEKKNTFQKLTATIGMK--- |
| PropionibacB5 | 111 | --MSLPPQIANMLVQLRRRDVVLRWTTPAWSRADLIIRET-TQAVVLCRGAMSKTLPGRV  |

|               |     |                                                             |
|---------------|-----|-------------------------------------------------------------|
| M13           | 156 | -----F                                                      |
| I2            | 156 | -----I                                                      |
| IF1           | 156 | -----F                                                      |
| fd            | 156 | -----F                                                      |
| IKe           | 156 | -----I                                                      |
| f1            | 156 | -----F                                                      |
| V_VJF         | 155 | -----F                                                      |
| XantoPhiLf    | 160 | -----G                                                      |
| PropionibacB5 | 168 | WPSHRLIMSRVVSAAATALSAGGQTAGRVSLSARSVIRLEQCPAIQAYDTLDRVLSVPV |

|               |     |                                                            |
|---------------|-----|------------------------------------------------------------|
| M13           | 157 | VGTLYSLITGS--KMPLPKLHVGVVKYG-----DSQLSPTVERWLYTGKNLYNAYD   |
| I2            | 157 | IGGLISVLSGG--RLPLPKVHFGIVKYG-----DNPQSLTVDKWVYTGTDLYAAYD   |
| IF1           | 157 | IGSIYSVITGS--KLPLPKVHVGIVKYG-----DSPQSMPTVERWLYTGCDLYAAYD  |
| fd            | 157 | VGTLYSLVTGS--KMPLPKLHVGVVKYG-----DSQLSPTVERWLYTGKNLYNAYD   |
| IKe           | 157 | IGGLISVLSGG--RLPLPKVHFGIVKYG-----DNPQSLTVDKWVYTGTDLYAAYD   |
| f1            | 157 | VGTLYSLITGS--KMPLPKLHVGVVKYG-----DSQLSPTVERWLYTGKNLYNAYD   |
| V_VJF         | 156 | LSTIVWILTGLQKIPMPKLIHIGIVKYG-----DTINALTVDKWMLWCTDLYSSYD   |
| XantoPhiLf    | 161 | RYRVTYFHTTS--PGKFEKVGQTLKYDPAIFPLYDGYAPGAENTEVEEKGKNVWAAMA |
| PropionibacB5 | 228 | AEGGRCVVCQG--RRSVPGCSCGD--D-----GDSC-----                  |

|               |     |                                                               |
|---------------|-----|---------------------------------------------------------------|
| M13           | 206 | TKQAFSSNYD-SGVYSYLTPLYSHGRYFKPLNLGQMKLTKIYLLKKFSRVLCLAI----G  |
| I2            | 206 | TKQIFTSRELSPPFCVPSPYYTHGIFAVKRDAKYMRMTKIYFKKMNVRVFLMASFLALG   |
| IF1           | 206 | TKQAFSDAYE-HSSFYSYLTPLYSHGRYAVKRDAFYMRLTRIYLLKKFSRVLCLFC----G |
| fd            | 206 | TKQAFSSNYD-SGVYSYLTPLYSHGRYFKPLNLGQMKLTKIYLLKKFSRVLCLAI----G  |
| IKe           | 206 | TKQIFTSREISPPYCYLSPYYTHGIFSVKRDAKYMRMTKIYFKKMNVRVFLMASFLALG   |
| f1            | 206 | TKQAFSSNYD-SGVYSYLTPLYSHGRYFKPLNLGQMKLTKIYLLKKFSRVLCLAI----G  |
| V_VJF         | 207 | TKQIFQNHYP-HGTYSVLPPWYIHGRYTVPYTARNIMRITKILFRKYSRVAMFAV----G  |
| XantoPhiLf    | 219 | VRAAIFLTLGGVGIYF-FMHYFTKDRADPNKPMASA-----SQTTPKPTHVCA----G    |
| PropionibacB5 | 255 | -----GTGRGAGPLGVARD-----                                      |

|               |     |                                                               |
|---------------|-----|---------------------------------------------------------------|
| M13           | 261 | FASAFTYSYITQPK--PEVK-----KVVS-----QTY-DFDKFTIDSSQRLNL         |
| I2            | 266 | ACVGFYKSRQINEQLSNMPVASAQANTT-----KTDHTID-ELPRLSINSFAQMGY      |
| IF1           | 261 | FVSAFTYLSLSKPEATPOLKPVTT-QIIT-----SRY-KPSELRIITTSYRMGN        |
| fd            | 261 | FASAFTYSYITQPK--PEVK-----KVVS-----QTY-DFDKFTIDSSQRLNL         |
| IKe           | 266 | AACGIFYKSQAYSNQLQHIQDNSKTSVIS-----KTDQSAE-ILPRLSINSYSQMGY     |
| f1            | 261 | FASAFTYSYITQPK--PEVK-----KVVS-----QTY-DFDKFTIDSSQRLNL         |
| V_VFJ         | 262 | AAFGAAEWHFTSPE--PELI-----QLVQAQNQMLTSES DHKLSELLGGFTISRYTALP- |
| XantoPhiLf    | 266 | FANCAPSVPIQPPP--PDPL-----ADLTQEQ-----RYVAQLA-DKGRIRLSARARVGD  |
| PropionibacB5 | 269 | -----PSRAGREV--TALR-----AVES-----TSS-----                     |

|               |     |                                                              |
|---------------|-----|--------------------------------------------------------------|
| M13           | 301 | SYR--YVEKDSK-GKLINSDD---LQKQGYSLTYIDLCTVSIKKGNSNEIVKC--N---- |
| I2            | 317 | DVN--VSEKDAK-GKIYSEF---LMKSGYALDIKDSCHITLRKRNYIQOVTG--EG---  |
| IF1           | 307 | AVG--FEEMDAK-KQKIASDD---LIKDGFRMVYITPCSVELIKDGKHEKVT---C---- |
| fd            | 301 | SYR--YVEKDSK-GKLINSDD---LQKQGYSLTYIDLCTVSIKKGNSNEIVKC--N---- |
| IKe           | 317 | DVS--VTEKDAK-AKIYNSFD---LIKDGYRVDIKDACHVTIVKKSIIQOITC--EG--- |
| f1            | 301 | SYR--YVEKDSK-GKLINSDD---LQKQGYSLTYIDLCTVSIKKGNSNEIVKC--N---- |
| V_VFJ         | 314 | DAP--VTEELSNAGKRLTSYE---LQSMGFEIEPLSRCEIIIKSGAQNETIHC-----   |
| XantoPhiLf    | 313 | QDRAWIQWIDAS-NNVVEELDLSQIRALGYSVSVVTY-GVRLSAGK--HIMVATAWPWTA |
| PropionibacB5 | 288 | -----DLAVRLGKKSEAEGMNPP-----                                 |

|               |     |                                                              |
|---------------|-----|--------------------------------------------------------------|
| M13           |     | -----                                                        |
| I2            |     | -----                                                        |
| IF1           |     | -----                                                        |
| fd            |     | -----                                                        |
| IKe           |     | -----                                                        |
| f1            |     | -----                                                        |
| V_VFJ         |     | -----                                                        |
| XantoPhiLf    | 369 | PIREKDARLYNMAPDGSGGAAGVATAGSDGGGADRDQVRGGVIEYGPRTQGTFFDNKGYS |
| PropionibacB5 | 306 | -----                                                        |

|               |     |              |
|---------------|-----|--------------|
| M13           |     | -----        |
| I2            |     | -----        |
| IF1           |     | -----        |
| fd            |     | -----        |
| IKe           |     | -----        |
| f1            |     | -----        |
| V_VFJ         |     | -----        |
| XantoPhiLf    | 429 | SSTSTPATTLQM |
| PropionibacB5 | 306 | -----ASA---  |

## Supplementary Figure 2

|               |   | Putative Walker A                                           |  |
|---------------|---|-------------------------------------------------------------|--|
|               |   | GXXXXGKS/T                                                  |  |
| M13           | 1 | MA-VY-----FVTGKLGSGKTLVSVG-KIQDKIVAGCKIATNLD-LRLQNLPO       |  |
| I2            | 1 | MA-VY-----VVTGKLGAGKTLVAVS-RIQRTLAKGGIVATNLD-LKLHHFPQ       |  |
| IF1           | 1 | MA-VY-----VVTGKLGAGKTLVAVG-KIQDKIVSGCRVATNLD-LRIHKLPK       |  |
| fd            | 1 | MA-VY-----FVTGKLGSGKTLVSVG-KIQDKIVAGCKIATNLD-LRLQNLPO       |  |
| IKe           | 1 | MA-VY-----VVTGKLGAGKTLVAVS-RIQRTLAKGGIVATNLD-LKLHHFPQ       |  |
| f1            | 1 | MA-VY-----FVTGKLGSGKTLVSVG-KIQDKIVAGCKIATNLD-LRLQNLPO       |  |
| V_VJF         | 1 | MASVY-----FVTGKLGSGKSLIAVS-RIRDALMRGVPVATNLD-INLKEM--       |  |
| XantoPhiLf    | 1 | ML-VF-----NEGVPRAKGSYDAVKNHILPALKKGRRVFARLNGLRFDRIAK        |  |
| PropionibacB5 | 1 | MS-WQSKRDLRRRFGIVGYVGSNGSGKSLMAVL-DTMPTLEAGQVLSVLR-LLDWENFR |  |

  

|               |    | Putative Walker B                                            |  |
|---------------|----|--------------------------------------------------------------|--|
|               |    | hhhhDE                                                       |  |
| M13           | 46 | V-GRFAK-TPRVLRIIPDKPSISDLLAIGRGND---SYDENKNGLLVLDECGTWFNTRSW |  |
| I2            | 46 | V-GRYAK-QCRMRIADKPTLEDLEAIGRGNL---SYDESKNGLLVLDECGTWFNSRNW   |  |
| IF1           | 46 | V-GIFAK-SPDVIRIPDKPSISDLLAIGRGNN---SYDENKNGLLVLDECGTWFNSRSW  |  |
| fd            | 46 | V-GRFAK-TPRVLRIIPDKPSISDLLAIGRGND---SYDENKNGLLVLDECGTWFNTRSW |  |
| IKe           | 46 | V-GRYAK-QCRMRIADKPTLEDLEAIGRGNL---TYDESKNGLLVLDECGTWFNSRNW   |  |
| f1            | 46 | V-GRFAK-TPRVLRIIPDKPSISDLLAIGRGND---SYDENKNGLLVLDECGTWFNTRSW |  |
| V_VJF         | 45 | I-GRDKR-NTRLRYRLPDKPTVEDIEILGYVNK---SYDTSKDGLLVLDECGTWFNSRTW |  |
| XantoPhiLf    | 47 | HLGMAENDVQHLLVLVDTKDVSKLFACTQDESGKWCIPDEFKDALVVIDEVHEFYVNER- |  |
| PropionibacB5 | 58 | P-CDDP--GCDLPGHPDHLAAHPLWVPLRELS---QMLDFEGCDIILDEVTVGVASSRES |  |

# Supplementary Figure 3

|               |     | Gly29 Cys30                                                    |               |
|---------------|-----|----------------------------------------------------------------|---------------|
| M13           | 1   | MA-VY-----FVTGKLGSGKTLVSVG-KIQDKIVAGCKIATNLD-LRLQNLPO          |               |
| I2            | 1   | MA-VY-----VVTGKLGAGKTLVAVS-RIQRTLAKCGIVATNLD-LKLHHFPQ          |               |
| IF1           | 1   | MA-VY-----VVTGKLGAGKTLVAVG-KIQDKIVSCGRVATNLD-LRTHKLPR          |               |
| fd            | 1   | MA-VY-----FVTGKLGSGKTLVSVG-KIQDKIVAGCKIATNLD-LRLQNLPO          |               |
| IKe           | 1   | MA-VY-----VVTGKLGAGKTLVAVS-RIQRTLAKCGIVATNLD-LKLHHFPQ          |               |
| f1            | 1   | MA-VY-----FVTGKLGSGKTLVSVG-KIQDKIVAGCKIATNLD-LRLQNLPO          |               |
| V_VJF         | 1   | MASVY-----FVTGKLGSGKSLIAVS-RIRDALMRCVPVATNLD-INLKEM--          |               |
| XantoPhiLf    | 1   | ML-VF-----NEGVPRACKSYDAVKNEILPALKKGRVFAFLNGLRFDRIAK            |               |
| PropionibacB5 | 1   | MS-WQSKRDLRRRFGIVGYVGSNGSGKSLMAVL-DTMTPEACROVLSTVR-LLDWENPR    |               |
|               |     | Gly47                                                          | Cys90         |
| M13           | 46  | V-GRFAK-TPRVLRIIPDKPSISDLLAIGRGND---SYDENKNGLLVLDECGTWFNTRSW   |               |
| I2            | 46  | V-GRYAK-QCRMRIADKPTLEDLEAIGRGNL---SYDESKNGLLVLDECGTWFNSRNW     |               |
| IF1           | 46  | V-GIFAK-SPDVIRIPDKPSISDLLAIGRGNN---SYDENKNGLLVLDECGTWFNSRSW    |               |
| fd            | 46  | V-GRFAK-TPRVLRIIPDKPSISDLLAIGRGND---SYDENKNGLLVLDECGTWFNTRSW   |               |
| IKe           | 46  | V-GRYAK-QCRMRIADKPTLEDLEAIGRGNL---TYDESKNGLLVLDECGTWFNSRNW     |               |
| f1            | 46  | V-GRFAK-TPRVLRIIPDKPSISDLLAIGRGND---SYDENKNGLLVLDECGTWFNTRSW   |               |
| V_VJF         | 45  | I-GRDKR-NTRLIYRIIPDKPTVEDIEILGYVVK---SYDTSKDGLIVLDECGTWFNSRTW  |               |
| XantoPhiLf    | 47  | HLGMAENDVQHLLVLVDTKDVSKLFACTQDES GKWCIPDEFKDALVVIDEVHEFYVNER-  |               |
| PropionibacB5 | 58  | P-CDDP--GCDLPGHPDHAAHPLWVPLRELS---QMLDFEGGDIILDEVTGVASSRES     |               |
|               |     | Gly118                                                         | Cys146        |
| M13           | 100 | NDKERQPII-DWFLHARKLGWDIIFLVQDLISIVDKQARSALAEHVVYCRRLDRITLP---  |               |
| I2            | 100 | SDKSRQPM-DWFLHARKLGWDVIFIIQDISLMDKQAREALAEHVVYCRRLDKINIP---    |               |
| IF1           | 100 | ADKERQSVI-NWFLHARKLGWDIIFLIQDISIMDKQARVALAEHVVYCRRLDKITIP---   |               |
| fd            | 100 | NDKERQPII-DWFLHARKLGWDIIFLVQDLISIVDKQARSALAEHVVYCRRLDRITLP---  |               |
| IKe           | 100 | SDKSRQPM-DWFLHARKLGWDIIFIIQDISLMDKQARDALAEHVVYCRRLDKINIP---    |               |
| f1            | 100 | NDKERQPII-DWFLHARKLGWDIIFLVQDLISIVDKQARSALAEHVVYCRRLDRITLP---  |               |
| V_VJF         | 99  | NDKNRQALL-DRFLHTRKLGWDVIFIVQNISMVDKQAREGLAEHVVYCRRLDRMQLP---   |               |
| XantoPhiLf    | 106 | --KPLAPAVENFWALLGQNGCDVIMTQWINRLHSAVKAR-IEKKNTFOKLTATIGMK---   |               |
| PropionibacB5 | 111 | --MSLPPQIANMLVQLRRRDVVLRWTTPAWSRADLIIRET-TQAVVLCRGAMSKTLPGRV   |               |
| M13           | 156 | -----F                                                         |               |
| I2            | 156 | -----I                                                         |               |
| IF1           | 156 | -----F                                                         |               |
| fd            | 156 | -----F                                                         |               |
| IKe           | 156 | -----I                                                         |               |
| f1            | 156 | -----F                                                         |               |
| V_VJF         | 155 | -----F                                                         |               |
| XantoPhiLf    | 160 | -----G                                                         |               |
| PropionibacB5 | 168 | WPSHRLIMSRVVSAAATALSAGGQTAGRVSSLARSVIRLEQCPAIQAYDTLDRVLSVPV    |               |
|               |     | Gly197                                                         |               |
| M13           | 157 | VGTLYSLITGS-KMPLPKLHVGVVKYG-----DSQLSPTVERWLYTGKNLYNAYD        |               |
| I2            | 157 | IGGLISVLSGG-RIPLPKVHFGIVKYG-----DNPQSLTVDKWLYTGTDLYAAYD        |               |
| IF1           | 157 | IGSIYSVITGS-KIPLPKVHVGVVKYG-----DSPQSMPTVERWLYTGTDLYAAYD       |               |
| fd            | 157 | VGTLYSLVTGS-KMPLPKLHVGVVKYG-----DSQLSPTVERWLYTGKNLYNAYD        |               |
| IKe           | 157 | IGGLISVLSGG-RIPLPKVHFGIVKYG-----DNPQSLTVDKWLYTGTDLYAAYD        |               |
| f1            | 157 | VGTLYSLITGS-KMPLPKLHVGVVKYG-----DSQLSPTVERWLYTGKNLYNAYD        |               |
| V_VJF         | 156 | LSTIVWILTLGQLKIPMPKLIHIGIVKYG-----DTINALTVDKWMLWGTDLYSSYD      |               |
| XantoPhiLf    | 161 | RYRVTYFHTTS--PGKFEKVGGQTLKYDPAIFPLYDGYAPGAENTEVVEEGGRNVWAAMA   |               |
| PropionibacB5 | 228 | AEGGRCVVCVG--RRSVPGCSCGD--D-----GDS-                           |               |
|               |     | Gly229                                                         | Cys256 Gly260 |
| M13           | 206 | TKQAFSSNYD-SGVYSYLTPLYLSHGRYFKPLNLGQMKLTKIYLKKFSRVLCIAI----    |               |
| I2            | 206 | TKQIFTSDELSPPFPCPVSPYYTHGIFAVKRDAKYMRMTKIYFKKMNRVWLMAFSLALG    |               |
| IF1           | 206 | TKQAFSDAYE-HSSFYSYLTPLYLSHGRYAVKRDAFTYMRITRIYLLKKYSRVLCIFC---- |               |
| fd            | 206 | TKQAFSSNYD-SGVYSYLTPLYLSHGRYFKPLNLGQMKLTKIYLKKFSRVLCIAI----    |               |
| IKe           | 206 | TKQIFTSDELSPPYCPLSPYYTHGIFSVKRDAKYMRMTKIYFKKMNRVFLMAFSLALG     |               |
| f1            | 206 | TKQAFSSNYD-SGVYSYLTPLYLSHGRYFKPLNLGQMKLTKIYLKKFSRVLCIAI----    |               |
| V_VJF         | 207 | TKQIFQNHYP-HCTYSVLPWYIHGRYTVPYTARNIMRITKILFRKFSRVAMEFAV----    |               |
| XantoPhiLf    | 219 | VRAAIFLTLGGVGIIYF-FMHYFTKDRADPNKPMASA-----SQTTPKPTHVGA----     |               |
| PropionibacB5 | 255 | -----GTGRGAGELGVARD-----                                       |               |

|               |     |                                                              |
|---------------|-----|--------------------------------------------------------------|
| M13           | 261 | FASAFTYSYITQPK--PEVK-----KVVS-----QTY-DFDKFTIDSSQRLNL        |
| I2            | 266 | ACVGFYKSRQINEQLSNMPVASAQANTT-----KTDHTID-ELPRLSINSFAQMGY     |
| IF1           | 261 | FVSAFTYLSLSKPEATPOLKPVTT-QIIT-----SRY-KPSELRIITTSYRMGN       |
| fd            | 261 | FASAFTYSYITQPK--PEVK-----KVVS-----QTY-DFDKFTIDSSQRLNL        |
| IKe           | 266 | AACGIFYKSQAYSNQLQHIQDNSKTSVIS-----KTDQSAE-ILPRLSINSYSQMGY    |
| f1            | 261 | FASAFTYSYITQPK--PEVK-----KVVS-----QTY-DFDKFTIDSSQRLNL        |
| V_VJF         | 262 | AAFCAAEWHFTSPE--PELI-----QLVQAQNQMLTSESDHKLSELLGGFTISRYTALP- |
| XantoPhiLf    | 266 | FANCAPSVPIQPPP--PDPL-----ADLTQEQ-----RYVAQLA-DKGRIRLSARARVGD |
| PropionibacB5 | 269 | -----PSRAGREV--TALR-----AVES-----TSS-----                    |

|               |     |                                                              |        |        |
|---------------|-----|--------------------------------------------------------------|--------|--------|
|               |     |                                                              | Cys332 | Cys347 |
| M13           | 301 | SYR--YVEKDSK-GKLINSDD---LQKQGYSLTYIDLCTVSIKKGNSNEIVKC--N---- |        |        |
| I2            | 317 | DVN--VSEKDAK-GKIYSEF---LMKSGYALDIKDSCHITLRKRNYIQOVTG--EG---  |        |        |
| IF1           | 307 | AVG--FEEMDAK-KQKIASDD---LIKDGERMVYITPCSVELIKDGKHEKVT---C---- |        |        |
| fd            | 301 | SYR--YVEKDSK-GKLINSDD---LQKQGYSLTYIDLCTVSIKKGNSNEIVKC--N---- |        |        |
| IKe           | 317 | DVS--VTEKDAK-AKIYNSFD---LIKDGYRVDIKDACHVTIVKKSIIQOITC--EG--- |        |        |
| f1            | 301 | SYR--YVEKDSK-GKLINSDD---LQKQGYSLTYIDLCTVSIKKGNSNEIVKC--N---- |        |        |
| V_VJF         | 314 | DAP--VTEELSNAGKRLTSYE---LQSMGFEIEPLSRCEIIIKSGAQNETIHC-----   |        |        |
| XantoPhiLf    | 313 | QDRAWIQWIDAS-NNVVEELDLSQLRALGYSVSVVTY-GVRLSAGK--HIMVATAWPWTA |        |        |
| PropionibacB5 | 288 | -----DLAVRLGKKSEAEGMNPP-----                                 |        |        |

|               |     |                                                              |
|---------------|-----|--------------------------------------------------------------|
| M13           |     | -----                                                        |
| I2            |     | -----                                                        |
| IF1           |     | -----                                                        |
| fd            |     | -----                                                        |
| IKe           |     | -----                                                        |
| f1            |     | -----                                                        |
| V_VJF         |     | -----                                                        |
| XantoPhiLf    | 369 | PIREKDARLYNMAPDGSGGAAGVATAGSDGGGADRDQVRGGVIEYGPRTQGTFFDNKGYS |
| PropionibacB5 | 306 | -----                                                        |

|               |     |              |
|---------------|-----|--------------|
| M13           |     | -----        |
| I2            |     | -----        |
| IF1           |     | -----        |
| fd            |     | -----        |
| IKe           |     | -----        |
| f1            |     | -----        |
| V_VJF         |     | -----        |
| XantoPhiLf    | 429 | SSTSTPATTLQM |
| PropionibacB5 | 306 | -----ASA---  |

Supplementary Figure 4

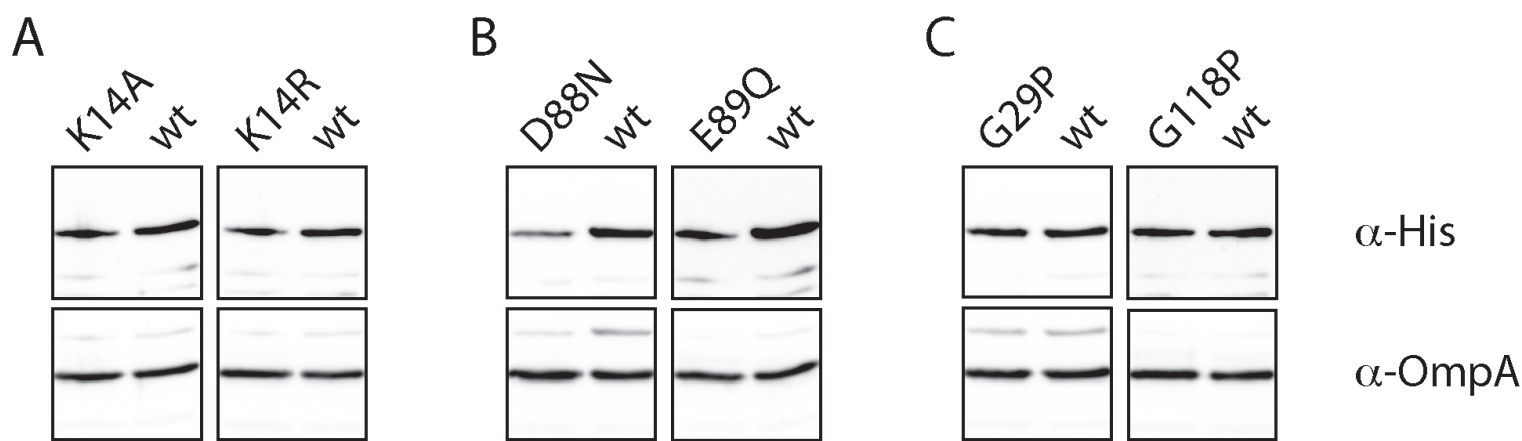

Supplement: Supplementary file 1 [file viruses-09-00073-s001.pdf]
